# Supplementary material for: Hollow and porous titanium nitride nanotubes as high-performance catalyst supports for oxygen reduction reaction
Source: Royal Society of Chemistry journal article supplement (doi:10.1039/c4ta02402h), 2014-06-25
Supplement: c4ta02402h1.pdf [file c4ta02402h1.pdf]

## **Electronic Supplementary Information (ESI)**

### **Hollow and porous titanium nitride nanotubes as high performance catalyst support for oxygen reduction reaction**

Zhanchang Pan<sup>1,\*</sup>, Yonghao Xiao<sup>1</sup>, Zhenggao Fu<sup>1</sup>, Guohe Zhan<sup>1</sup>, Shoukun Wu<sup>2</sup>, Chumin Xiao<sup>1</sup>, Guanghui Hu<sup>1</sup>, Zhigang Wei<sup>1</sup>

<sup>1</sup>School of Chemical Engineering and Light Industry, Guangdong University of Technology, Guangzhou, Guangdong, 510006, China

<sup>2</sup>Huizhou King Brother Electronic Technology Co., Ltd, Huizhou, 516083, China

\*Corresponding author: Zhanchang Pan, [panzhanchang@163.com](mailto:panzhanchang@163.com)

Figure S1.

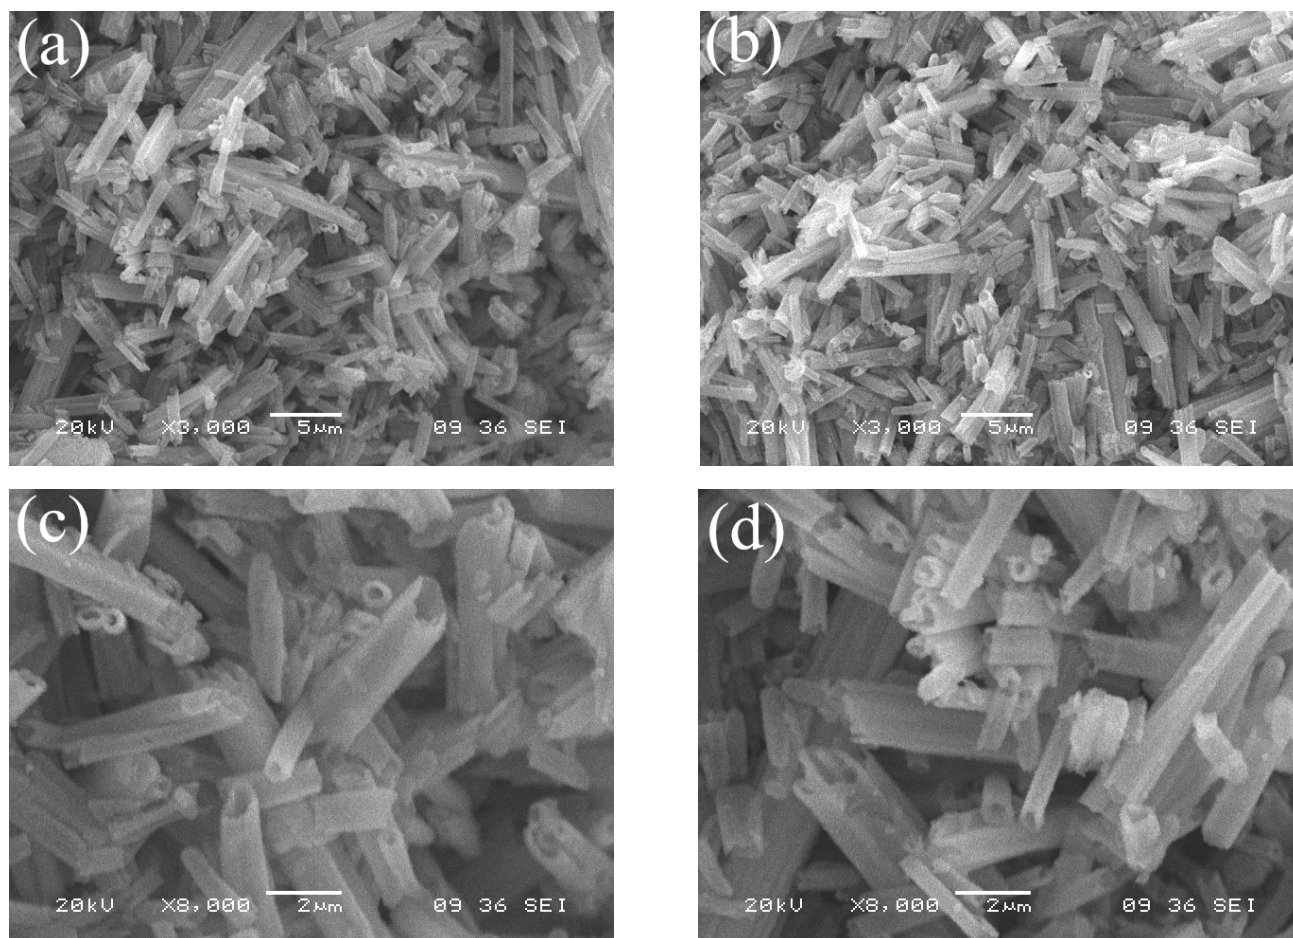

Figure S1. (a) and (c) SEM images of TiO<sub>2</sub> NTs. (b) and (d) SEM images of TiN NTs.

Figure S2.

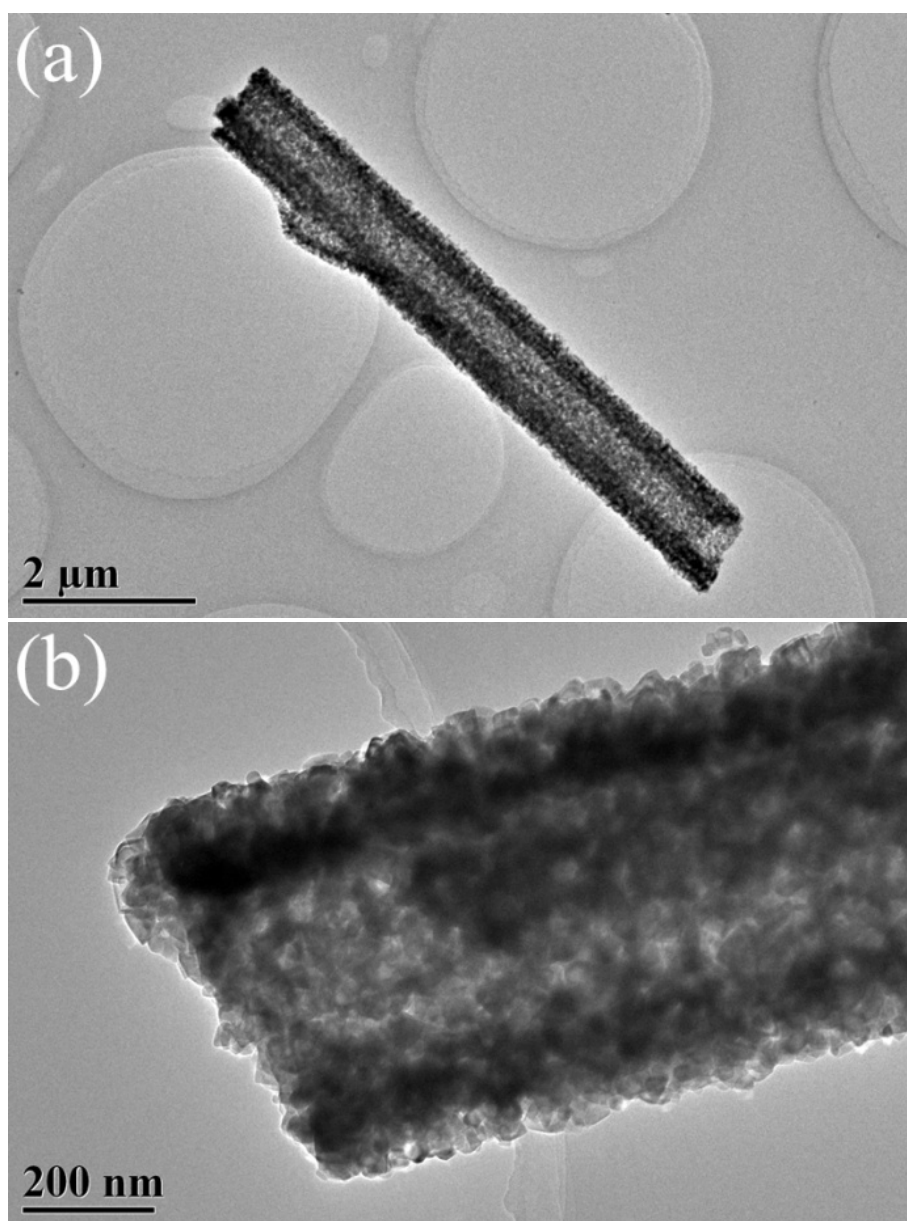

Figure S2. (a) TEM and (b) enlarged TEM images of TiO<sub>2</sub> NTs

Figure S3.

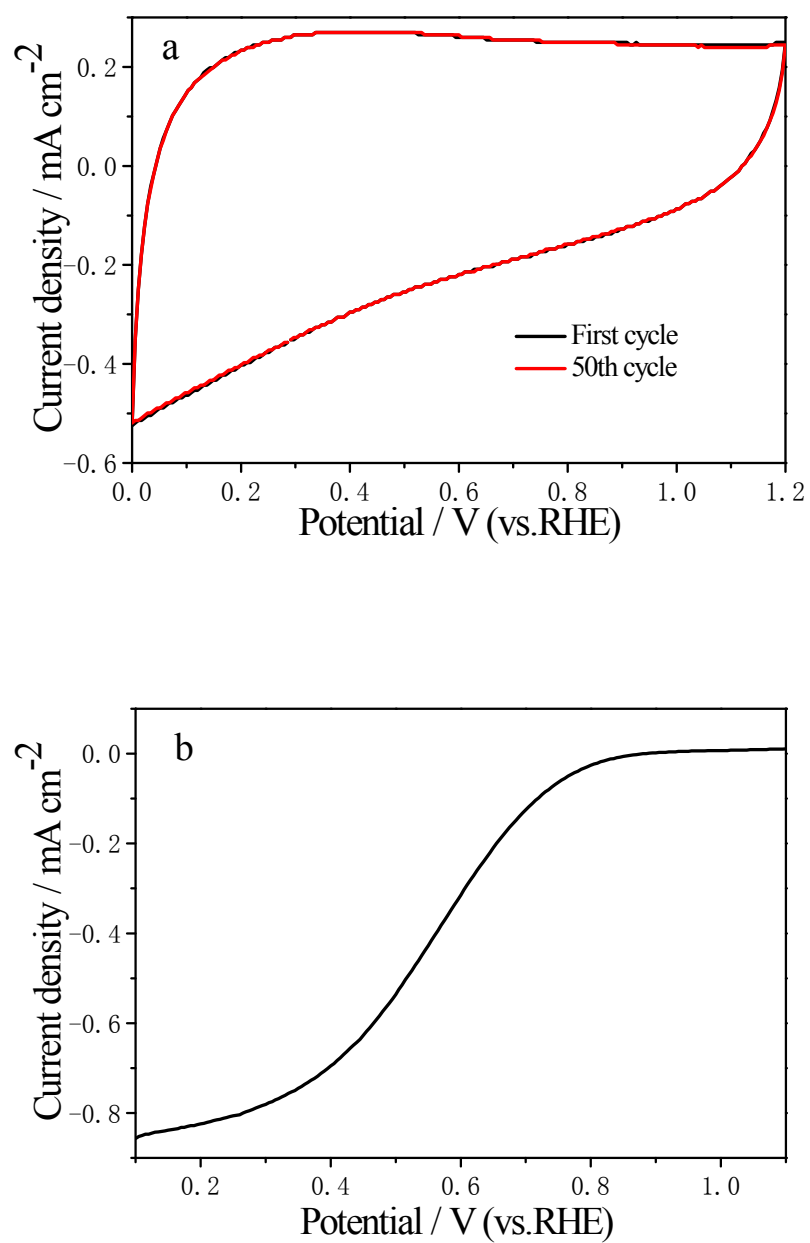

Figure S3. (a) CVs of TiN NTs in N<sub>2</sub> saturated 0.5M H<sub>2</sub>SO<sub>4</sub> solution at a scan rate of 50 mV/s. (b) The polarization curves of pure TiN NTs in a 0.1 M HClO<sub>4</sub> solution saturated with oxygen, using a RDE at 1600 rpm at a scan rate of 10 mV/s.

Figure S4.

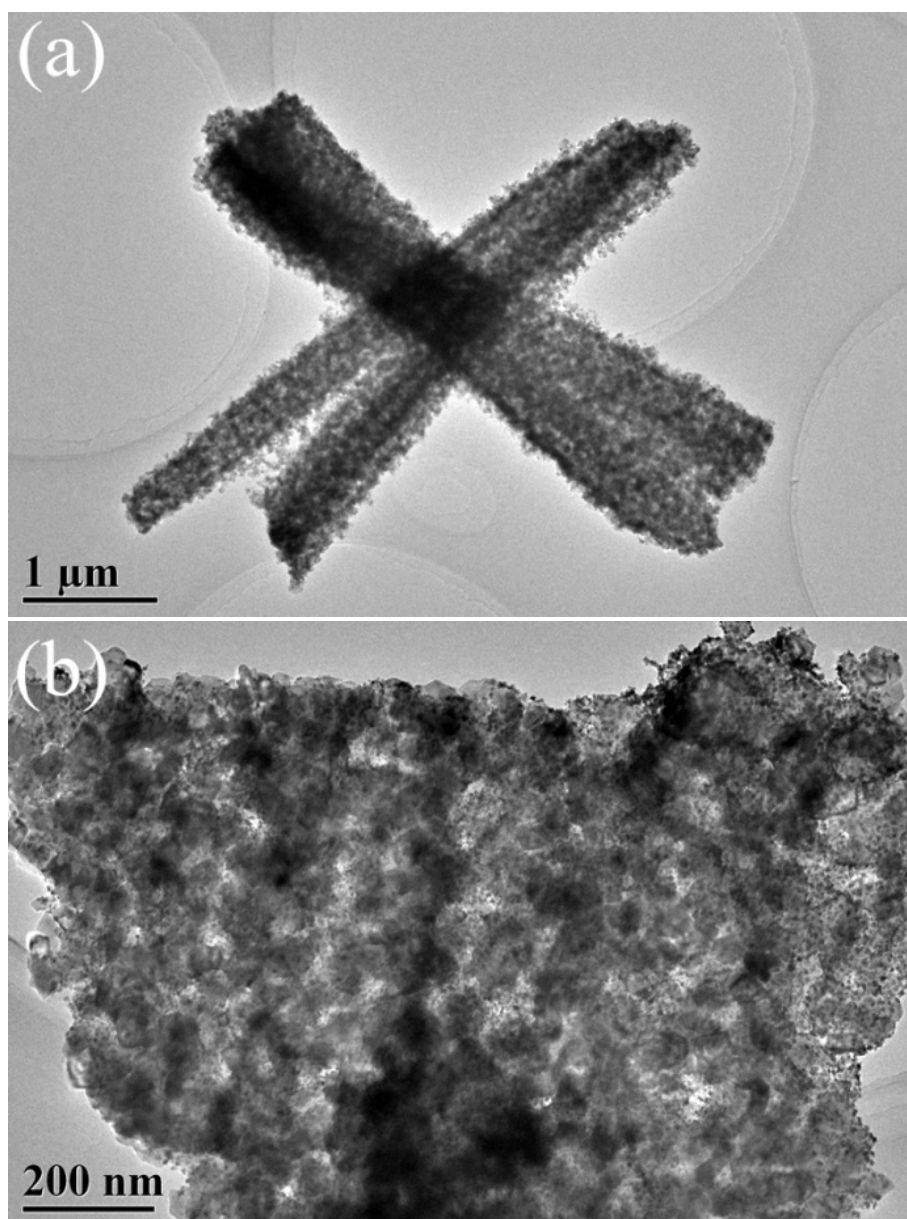

Figure S4. (a) TEM and (b) magnified TEM images of Pt/TiN NTs after the ADT test.

Figure S5.

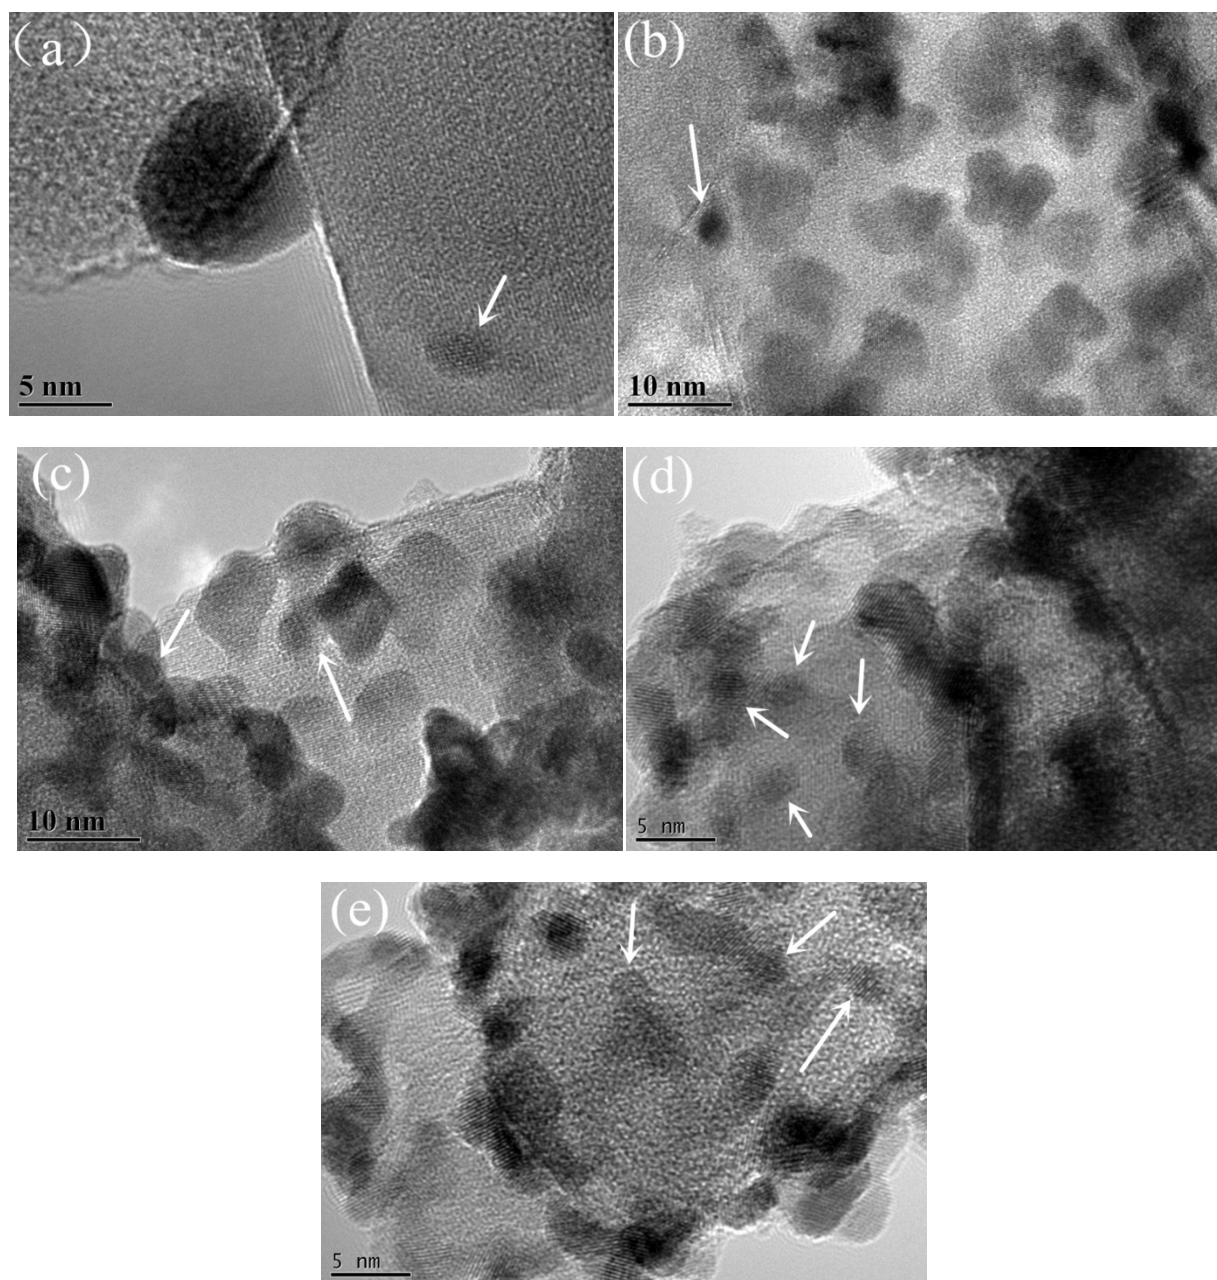

Figure S5. TEM images of the small Pt particles (pointed by arrows) alongside the bigger ones observed on the Pt/TiN NTs, from collected the Pt/TiN NTs catalyst after the ADT test, captured in different regions from the same TEM sample.
